# Supplementary material for: Emergence of ordered network mesophases in kinetic pathways of order–order transition for linear ABC triblock terpolymers
Source: Royal Society of Chemistry journal article supplement (doi:10.1039/c6sm02418a), 2016-01-01
Supplement: c6sm02418a1.pdf [file c6sm02418a1.pdf]

Supplemental Material for

**Emergence of ordered network mesophases in kinetic pathways of order-order transition for linear ABC triblock terpolymers**

*Tongjie Sun, Ping Tang, Feng Qiu and An-Chang Shi*

This file includes Figs. S1 to S6:

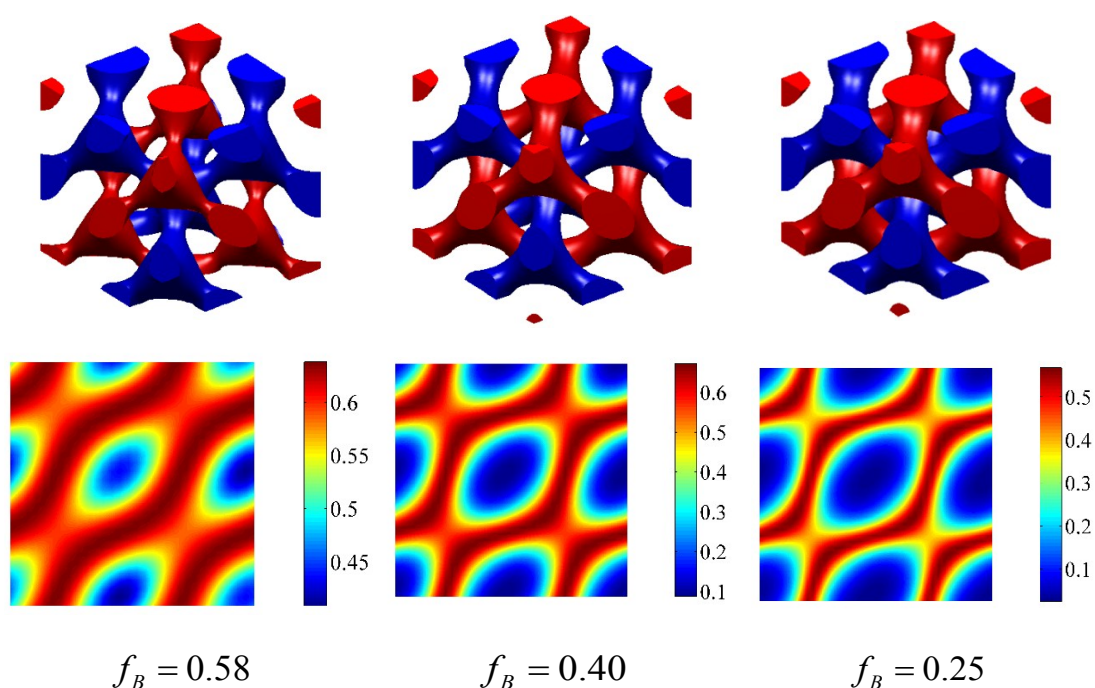

Fig. S1 Three dimensional morphologies of  $D^A$  structure and density profiles of the top view for B block with  $f_B$  decreasing along the isopleth  $f_A = f_C$  with  $\chi_{AB}N = \chi_{BC}N = 13, \chi_{AC}N = 35$ . Red and blue represent domains rich in A and C blocks, respectively.

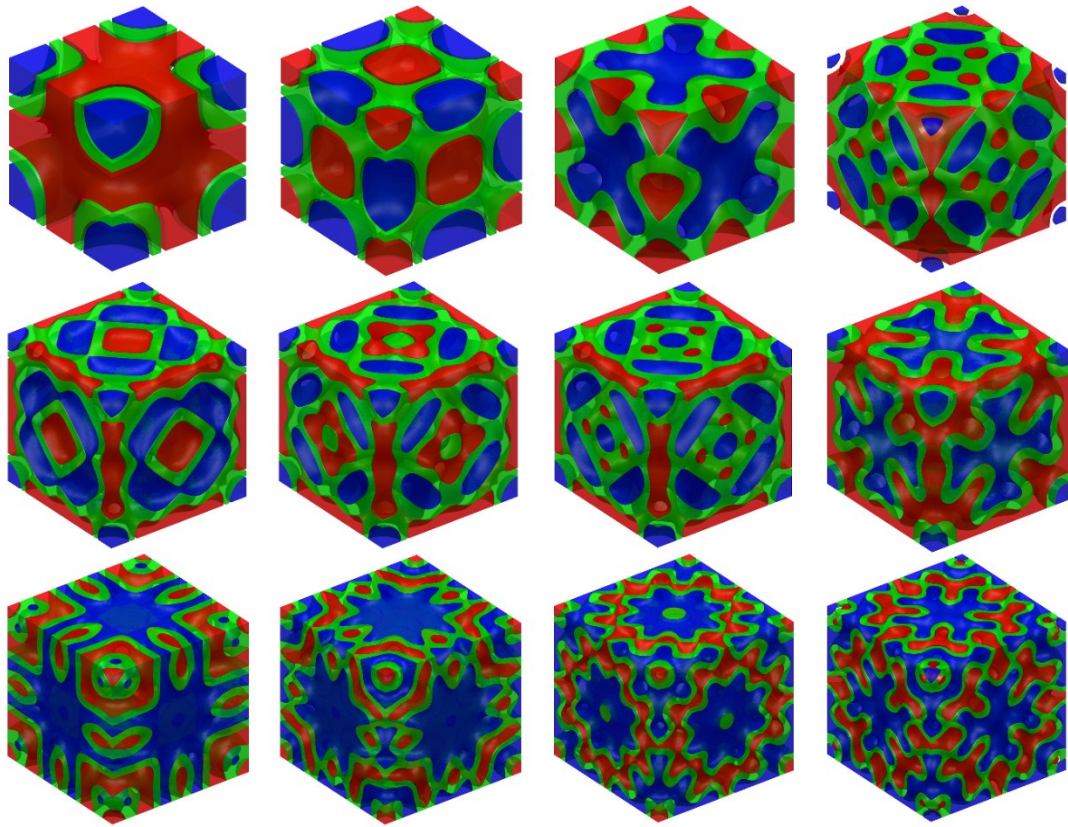

Fig. S2 Various metastable structures in the phase region of  $G^A$  structure with  $\chi_{AB}N = \chi_{BC}N = 13, \chi_{AC}N = 35, f_A = f_C = 0.23, f_B = 0.54$ . The red, green and blue colors represent the A-, B- and C-rich domains, respectively.

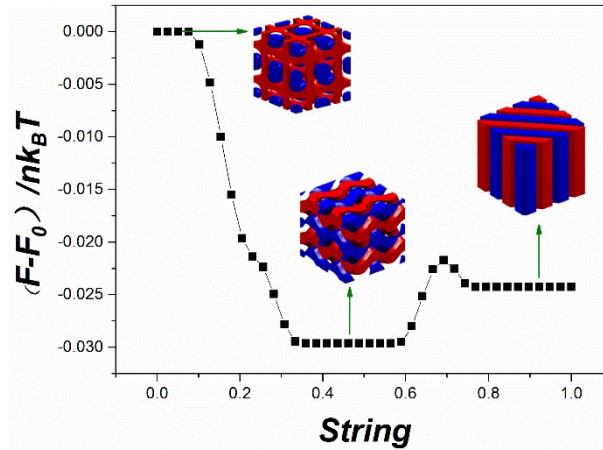

(a)

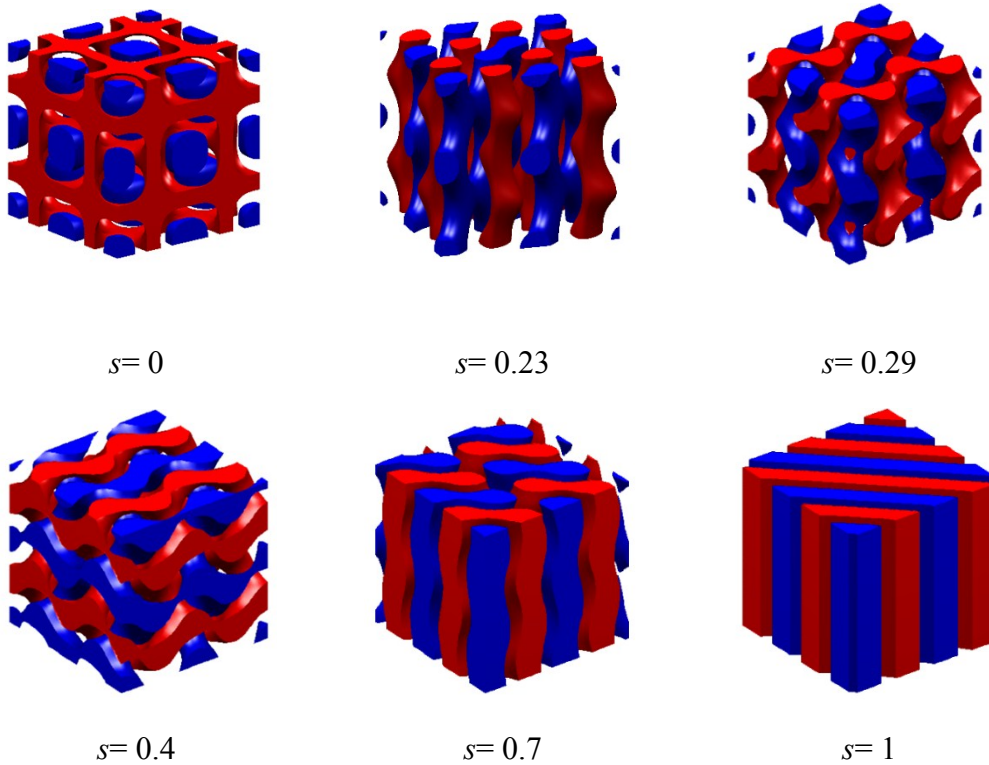

(b)

Fig. S3 Phase transition process for scanning the  $G^A$  structures. The two ends of the string are BCC sphere and L with (110) planes. (a) Minimal free energy pathway for scanning the  $G^A$  structures with  $\chi_{AB}N = \chi_{BC}N = 13, \chi_{AC}N = 35, f_A = f_C = 0.23, f_B = 0.54$ .

(b) Morphologies on the minimal free energy pathway. Red and blue represent domains rich in A and C blocks. For a clear presentation of the final pattern, the linear dimensions of the unit cell are replicated 2 times in each direction.

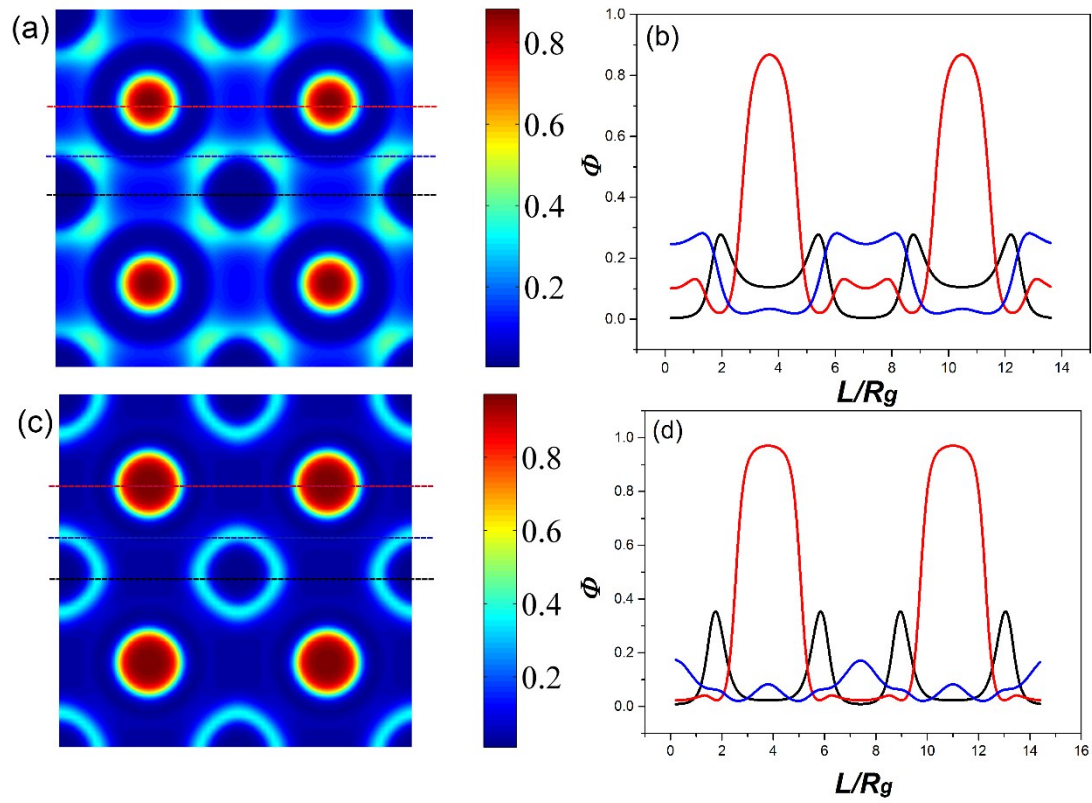

Fig. S4 (a) Density profiles of the top view for A block in P<sup>A</sup> structure when  $f_B=0.54$  shown in Fig. 8(a). Density distribution along the lines with different colors marked in the density profiles is shown in (b). (c) Density profiles of the top view for A block in P<sup>A</sup> structure when  $f_B=0.40$  shown in Fig. 8(a). Density distribution along the lines with different colors marked in the density profiles is shown in (d).



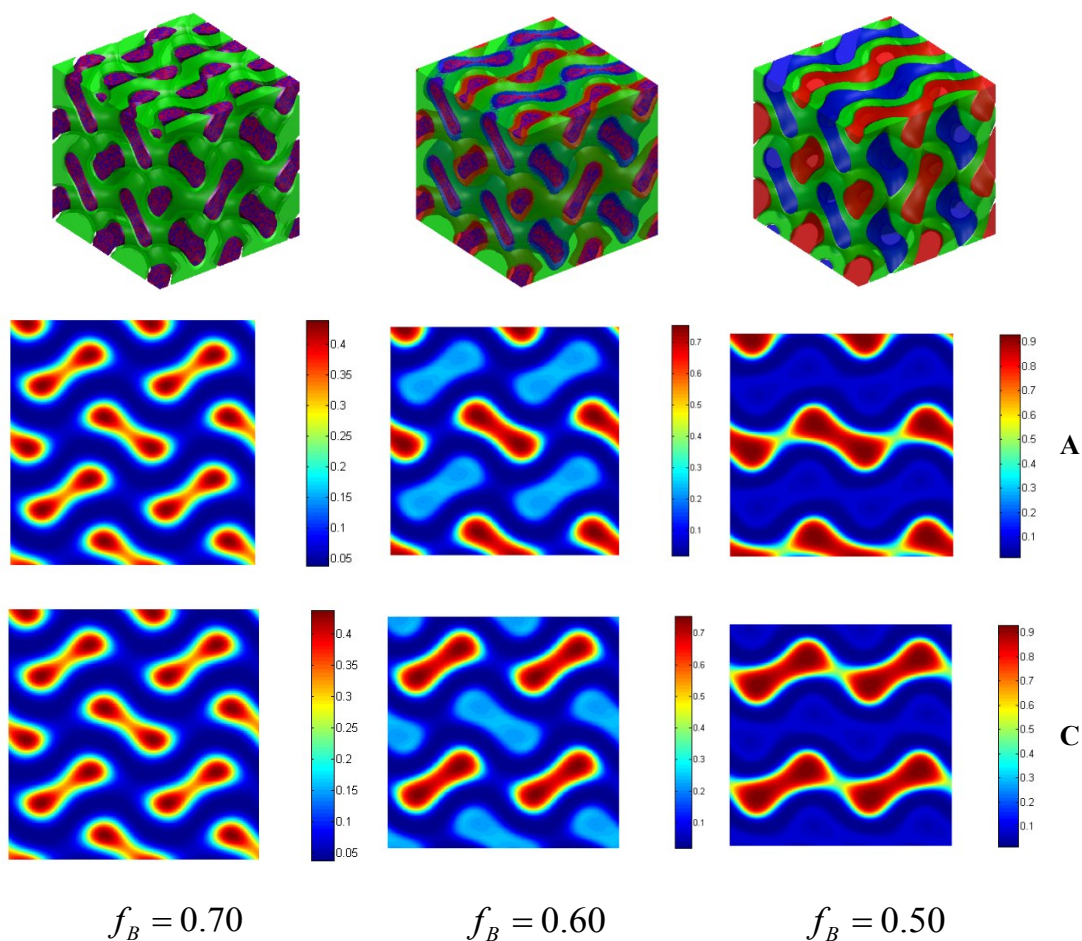

Fig. S5 Three dimensional morphologies of  $G^A$  structure and density profiles of the top view for A block and C block with  $f_B$  decreasing along the isopleth  $f_A = f_C$  with  $\chi_{AB}N = \chi_{BC}N = 35, \chi_{AC}N = 15$ . The red, green and blue colors represent the A-, B- and C-rich domains, respectively.

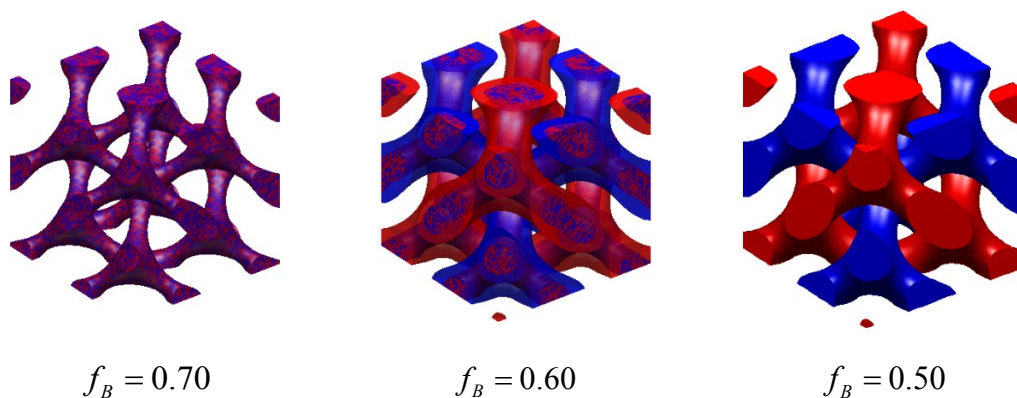

Fig. S6 Three dimensional morphologies of  $D^A$  structure with  $f_B$  decreasing along the isopleth  $f_A = f_C$  with  $\chi_{AB}N = \chi_{BC}N = 35, \chi_{AC}N = 15$ . The red and blue colors represent the

A- and C-rich domains, respectively.
